# Supplementary material for: 3D-Printed Tumor-on-Chip for the Culture of Colorectal Cancer Microspheres: Mass Transport Characterization and Anti-Cancer Drug Assays
Source: MDPI journal article supplement (doi:10.3390/bioengineering10050554), 2023-05-05
Supplement: s1 [file s1]

## Supplementary Figures

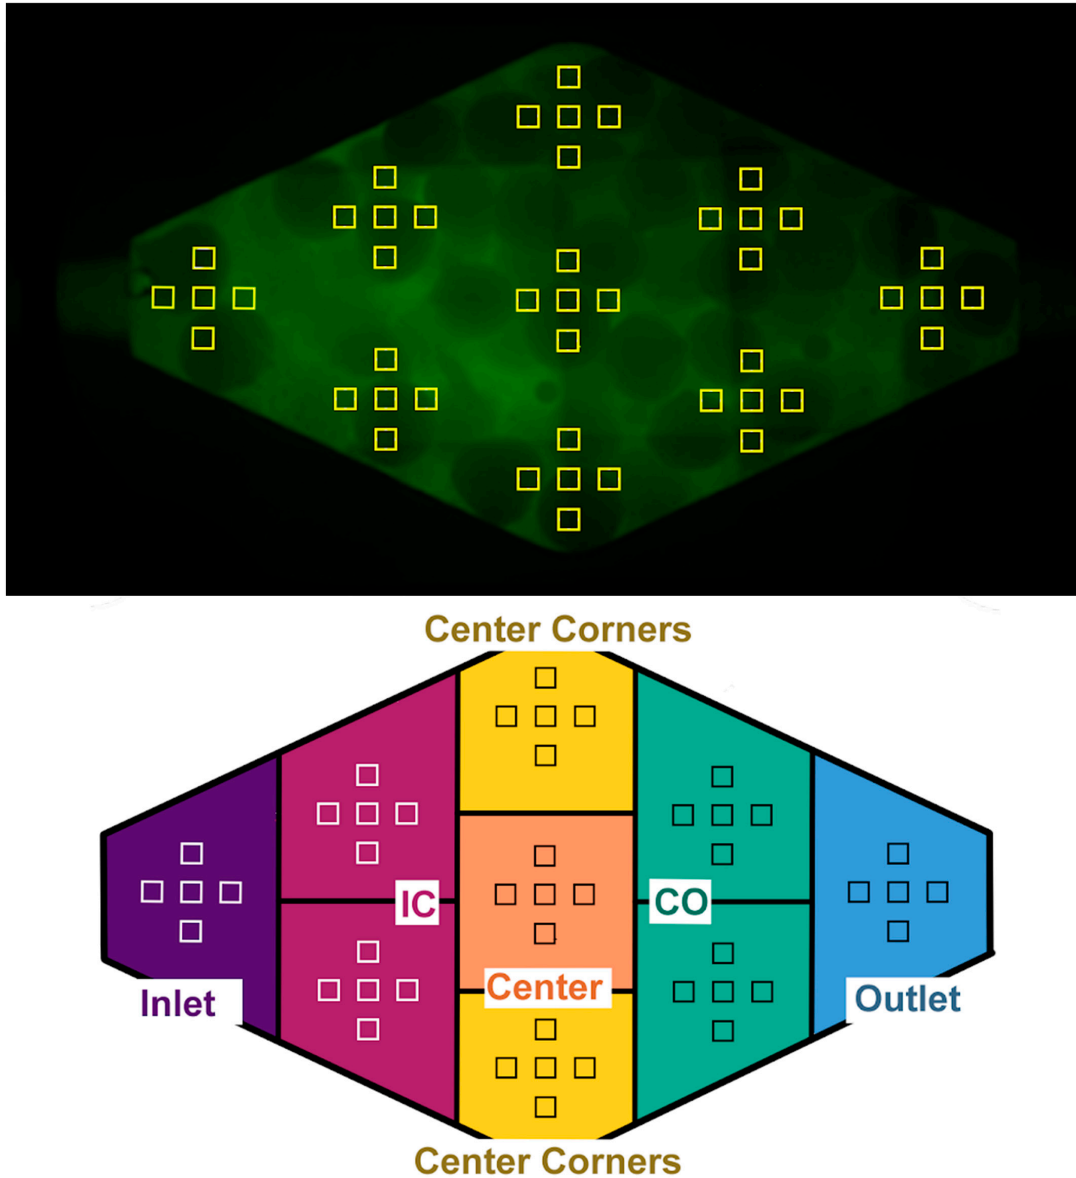

**Figure S1.** Image analysis for fluorescence measurements. Mean pixel fluorescence was obtained in each of the five 45000 pixel<sup>2</sup> and divided by area. We obtained the data per each hour in a 14-hour experiment. Due to the ToC's symmetry and similar numerical results, the mean was obtained for the center corners, IC and CO to be better displayed.

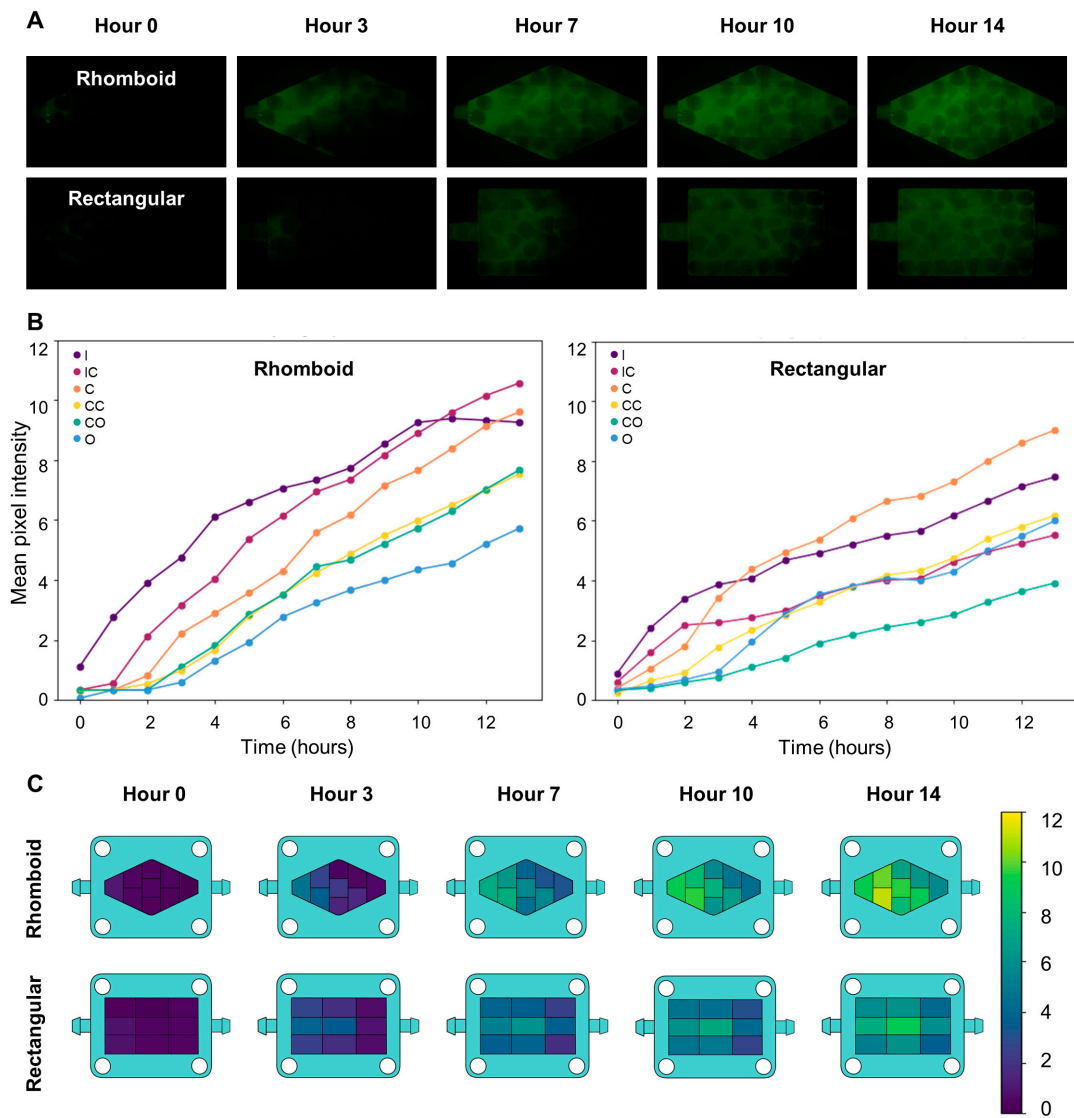

**Figure S2.** Comparison of culture media diffusion in two different ToC geometries. A) Fluorescence intensity change observed with FITC-dextran inside the mini-reactor in two different pool geometries: rhomboid and rectangular with 3.5% Alg + 2.5% GelMA microspheres. B) Quantification and comparison of culture media diffusion in the two different settings as represented by the increase in fluorescence intensity (FITC-dextran), measured by mean pixel intensity. C) Heatmaps representing culture media diffusion throughout the mini-reactor in different zones at several time points as observed by the increase in fluorescence.

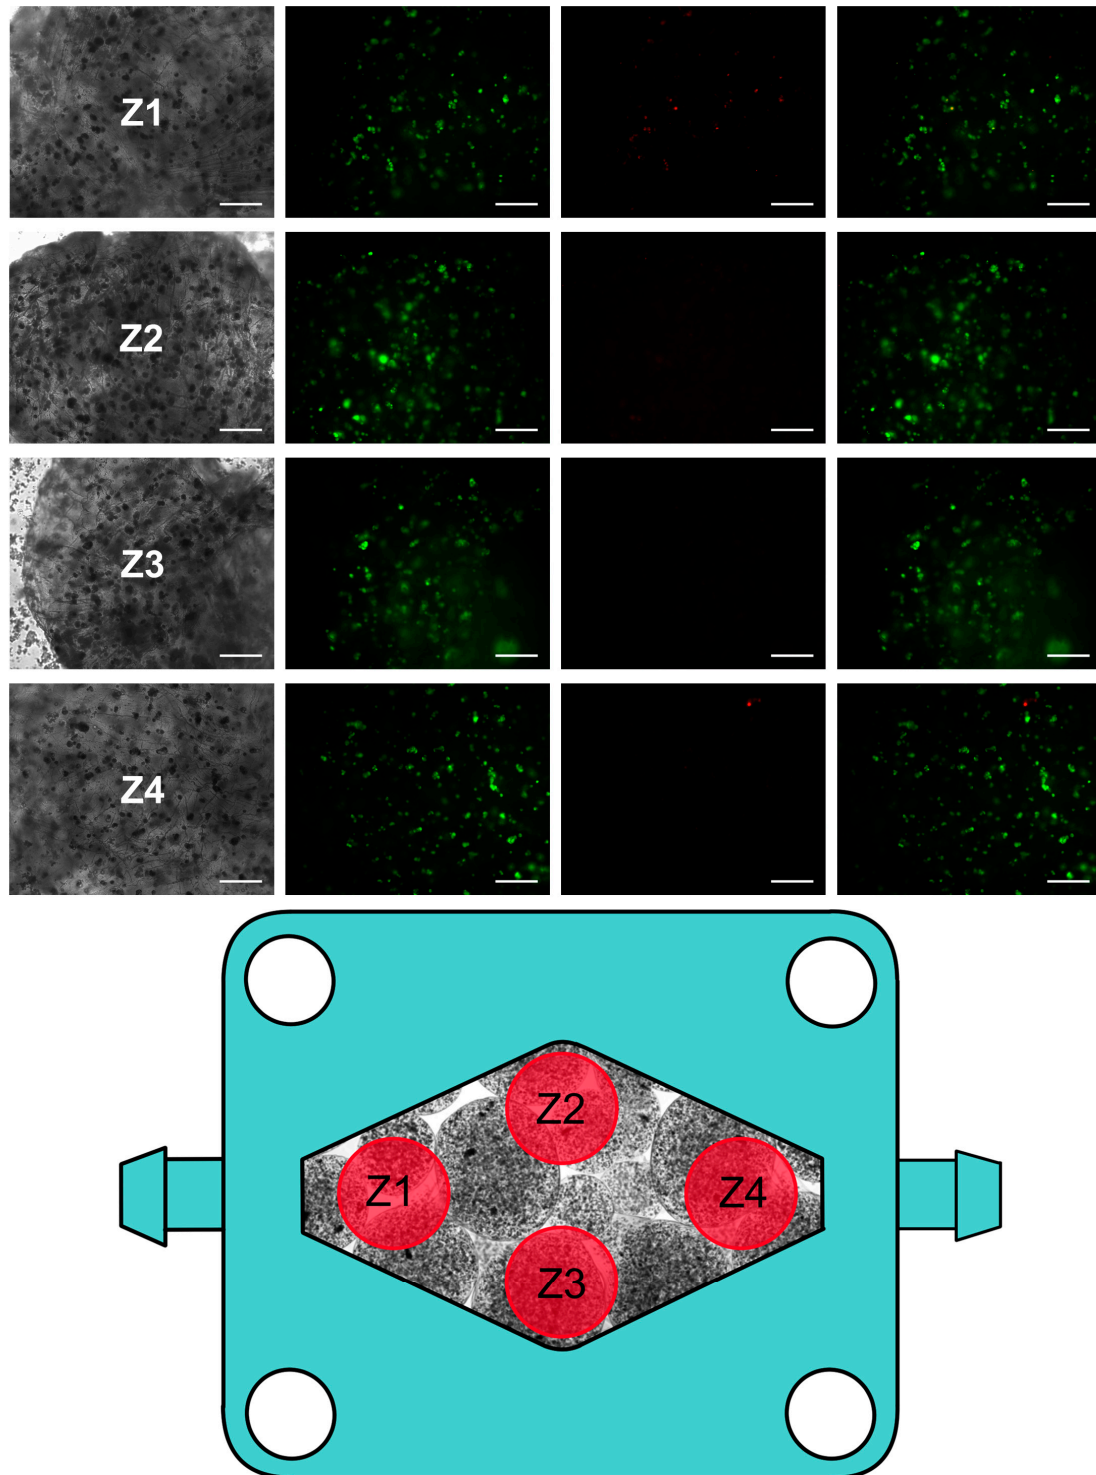

**Figure S3.** Survival of Caco2 microtumors in different regions of the ToC. Top: Bright field, Green channel (live), Red channel (dead), and merged fluorescence channels images of microspheres retrieved from different regions of the ToC. Scale bar: 200  $\mu\text{m}$ . Bottom: Map of the regions from which the microspheres were retrieved.
